# Supplementary material for: Neoadjuvant Chemoimmunotherapy for the Treatment of Locally Advanced Head and Neck Squamous Cell Carcinoma: A Single-Arm Phase 2 Clinical Trial
Source: PubMed Central journal article supplement — Clin Cancer Res. 2022 Jun 29;28(15):3268–76. doi: 10.1158/1078-0432.CCR-22-0666 (PMC9662919; doi:10.1158/1078-0432.ccr-22-0666), 2022-06-29
Supplement: ccr-22-0666_supplementary_data_ds1_suppds1.pdf [file ccr-22-0666_supplementary_data_ds1_suppds1.pdf]

**Neoadjuvant Chemotherapy Combined with Anti-PD-1 Antibody for the Treatment of Resectable Locally Advanced Head and Neck Squamous Cell Carcinoma**

**Version:** September 1, 2020 (V 2.0)

**Principal Investigators:** Prof. Kunyu Yang & Prof. Xiaomeng Zhang

**Study Sites:** Cancer center, Union Hospital, Tongji Medical College, Huazhong University of Science and Technology; Department of Otorhinolaryngology, Union Hospital, Tongji Medical College, Huazhong University of Science and Technology

## **Disclosure Statement**

This study was conducted by Union Hospital, Tongji Medical College, Huazhong University of Science and Technology.

All information in this document is confidential and is limited to be used by the staff who accepted the agreed purposes. No information can be disclosed, published, or transferred to any unauthorized personnel in any medium without the prior written consent of principal investigators.

## Contents

|                                                                                                                                                     |     |
|-----------------------------------------------------------------------------------------------------------------------------------------------------|-----|
| <b><u>Protocol Summary</u></b> .....                                                                                                                | 4   |
| <b><u>List of Abbreviations</u></b> .....                                                                                                           | 10  |
| <b><u>1. Background</u></b> .....                                                                                                                   | 13  |
| <b><u>1.1 Epidemiology of Head and Neck Squamous Cell Carcinoma (HNSCC)</u></b> ....                                                                | 13  |
| <b><u>1.2 EXTREME Regimen is the Standard Treatment for Recurrent or Metastatic HNSCC</u></b> .....                                                 | 13  |
| <b><u>1.3 Immunotherapy is Effective for Recurrent or Metastatic HNSCC</u></b> .....                                                                | 13  |
| <b><u>1.4 Higher Clinical and Pathological Response Rate Can be Achieved by Neoadjuvant Chemotherapy Combined with Anti-PD-1 Antibody</u></b> ..... | 15  |
| <b><u>1.5 Neoadjuvant Chemotherapy Combined with Immunotherapy May be an Optimal Regimen for Locally Advanced HNSCC</u></b> .....                   | 15  |
| <b><u>1.6 Clinical Study Progress on Camrelizumab</u></b> .....                                                                                     | 16  |
| <b><u>2. Study Profile</u></b> .....                                                                                                                | 18  |
| <b><u>2.1 Purpose</u></b> .....                                                                                                                     | 18  |
| <b><u>2.2 Primary Endpoints</u></b> .....                                                                                                           | 18  |
| <b><u>2.3 Secondary Endpoints</u></b> .....                                                                                                         | 18  |
| <b><u>2.4 Enrolled Population</u></b> .....                                                                                                         | 18  |
| <b><u>3. Subject Selection and Withdrawal</u></b> .....                                                                                             | 18  |
| <b><u>3.1 Inclusion Criteria</u></b> .....                                                                                                          | 18  |
| <b><u>3.2 Exclusion Criteria</u></b> .....                                                                                                          | 18  |
| <b><u>3.3 Withdrawal Criteria</u></b> .....                                                                                                         | 19  |
| <b><u>3.4 Treatment Discontinuation Criteria</u></b> .....                                                                                          | 22  |
| <b><u>3.5 Early Termination or Suspension of study</u></b> .....                                                                                    | 22  |
| <b><u>4. Treatment Regimen</u></b> .....                                                                                                            | 21  |
| <b><u>4.1 Neoadjuvant Immunotherapy</u></b> .....                                                                                                   | 21  |
| <b><u>4.2 Neoadjuvant Chemotherapy</u></b> .....                                                                                                    | 21  |
| <b><u>4.3 Surgery</u></b> .....                                                                                                                     | 21  |
| <b><u>4.4 Adjuvant Radiotherapy</u></b> .....                                                                                                       | 21  |
| <b><u>4.5 Follow-up</u></b> .....                                                                                                                   | 21  |
| <b><u>5. Sample Size</u></b> .....                                                                                                                  | 267 |
| <b><u>6. Grading and Treatment of Toxicity</u></b> .....                                                                                            | 267 |

|                                                                       |     |
|-----------------------------------------------------------------------|-----|
| <b><u>6.1 Definition of Clinically Significant Toxicity</u></b> ..... | 267 |
| <b><u>6.2 Treatment for Other Immune-related AEs</u></b> .....        | 278 |
| <b><u>7. Data Management</u></b> .....                                | 289 |
| <b><u>7.1 Case Report Form</u></b> .....                              | 289 |
| <b><u>7.2 Establishment of Database</u></b> .....                     | 289 |
| <b><u>7.3 Analysis Method</u></b> .....                               | 30  |
| <b><u>8. Ethic Regulations and Informed Consent</u></b> .....         | 30  |
| <b><u>8.1 Ethic Regulations</u></b> .....                             | 30  |
| <b><u>8.2 Informed Consent</u></b> .....                              | 30  |
| <b><u>References</u></b> .....                                        | 30  |

## Protocol Summary

---

|                                           |                                                                                                                                                                                                                                                                                                                                                                                                                                                                                                                                                                                                                                                                                                                                                                               |
|-------------------------------------------|-------------------------------------------------------------------------------------------------------------------------------------------------------------------------------------------------------------------------------------------------------------------------------------------------------------------------------------------------------------------------------------------------------------------------------------------------------------------------------------------------------------------------------------------------------------------------------------------------------------------------------------------------------------------------------------------------------------------------------------------------------------------------------|
| Topic                                     | Neoadjuvant Chemotherapy Combined with Anti-PD-1 Antibody for the Treatment of Resectable Locally Advanced Head and Neck Squamous Cell Carcinoma (HNSCC)                                                                                                                                                                                                                                                                                                                                                                                                                                                                                                                                                                                                                      |
| Version                                   | V2.0                                                                                                                                                                                                                                                                                                                                                                                                                                                                                                                                                                                                                                                                                                                                                                          |
| Study Sites                               | Cancer center, Union Hospital, Tongji Medical College, Huazhong University of Science and Technology<br>Department of Otorhinolaryngology, Union Hospital, Tongji Medical College, Huazhong University of Science and Technology                                                                                                                                                                                                                                                                                                                                                                                                                                                                                                                                              |
| Principal Investigators                   | Prof. Kunyu Yang & Prof. Xiaomeng Zhang                                                                                                                                                                                                                                                                                                                                                                                                                                                                                                                                                                                                                                                                                                                                       |
| Study type                                | Phase 2 clinical trial                                                                                                                                                                                                                                                                                                                                                                                                                                                                                                                                                                                                                                                                                                                                                        |
| Subject                                   | Operable locally advanced squamous cell carcinoma of the oral cavity, oropharynx, hypopharynx or larynx                                                                                                                                                                                                                                                                                                                                                                                                                                                                                                                                                                                                                                                                       |
| Purpose                                   | To observe and evaluate safety and efficacy of neoadjuvant chemotherapy combined with anti-PD-1 antibody in the treatment of locally advanced HNSCC                                                                                                                                                                                                                                                                                                                                                                                                                                                                                                                                                                                                                           |
| Number of Patients Planned to be Enrolled | 30                                                                                                                                                                                                                                                                                                                                                                                                                                                                                                                                                                                                                                                                                                                                                                            |
| Inclusion and Exclusion Criteria          | <p>Inclusion Criteria:</p> <ol style="list-style-type: none"><li>1. Aged between 18 and 70 years;<br/>Histologically diagnosed with squamous cell carcinoma of the oral cavity, oropharynx, hypopharynx or larynx, and resectable tumor evaluated by a head and neck surgeon prior to enrollment;</li><li>2. Locally advanced patients are defined as follows according to the 8th edition of the American Joint Committee on Cancer [AJCC] Guidelines:<br/>—Non-oro-pharyngeal HNSCC cancer and HPV-negative oro-pharyngeal cancer, stage III, IVA and IVB;<br/>—HPV-positive oro-pharyngeal cancer, stage II and III;<br/>HPV status for oro-pharyngeal cancer will be determined by p16 immunohistochemistry.</li><li>3. No prior anti-cancer therapy for HNSCC;</li></ol> |

---

- 
4. At least one evaluable target lesion according to the Response Evaluation Criteria In Solid Tumors (RECIST) version 1.1;
  5. Eastern Cooperative Oncology Group (ECOG) performance status 0-1;
  6. Normal major organ function in accordance with the following criteria:
    - (1) Blood routine examination (no blood transfusion within 14 days):
      - a. Hemoglobin (Hb)  $\geq 90$  g/L;
      - b. Absolute neutrophil count (ANC)  $\geq 1.5 \times 10^9$ /L;
      - c. Platelet (PLT)  $\geq 80 \times 10^9$ /L;
    - (2) Blood biochemistry:
      - a. Bilirubin (BIL)  $< 1.25 \times$  the upper limit of normal (ULN);
      - b. Alanine aminotransferase (ALT) and aspartate aminotransferase (AST)  $< 2.5 \times$ ULN; for patients with liver metastasis, ALT and AST  $< 5 \times$ ULN;
      - c. Serum creatinine (Cr)  $\leq$ ULN and endogenous creatinine clearance  $> 50$  mL/min (Cockcroft-Gaut formula);
  7. Written informed consent before enrollment;
  8. Patients who can adhere to study protocol, as judged by the investigator;
  9. Negative pregnancy test result for fertile female patients;
  10. Male patients and fertile female patients must agree to use two kinds of contraceptive measures (including at least one highly effective measure) during the whole study period.

Infertile female patients are those meeting at least one of the following criteria:

- Documented hysterectomy and/or bilateral oophorectomy;
  - Medical confirmed ovarian function decline;
  - Postmenopausal status, defined as cessation of menstruation for at least 12 consecutive months without pathological or physiological reasons, with serum follicle-stimulating hormone level in accordance with post-menopausal status.
11. Patients who are willing and able to adhere to follow-up, treatment plan, laboratory test and other study procedures.

Exclusion Criteria:

1. Prior immunotherapy with anti-PD-1, anti-PD-L1, anti-PD-L2, anti-CD137, anti-CTLA-4 antibody, or any other antibodies or drug that specifically targeted T cell co-stimulation or immune checkpoint pathways;
-

- 
2. Major surgery within 4 weeks before enrollment;
  3. Allergy to anti-PD-1 antibody or its excipients;
  4. Any active autoimmune disease or history of autoimmune disease, such as interstitial pneumonia, uveitis, enteritis, hepatitis, hypophysitis, vasculitis, myocarditis, nephritis, hyperthyroidism, hypothyroidism (patients can be enrolled after effective hormone replacement therapy) and so on. Patients with vitiligo, or those with asthma that had been completely relieved in childhood without intervention after adulthood or only require medical intervention with bronchodilators, can be enrolled;
  5. Other malignant tumors, except for those who had been cured with tumor-free survival more than 5 years, such as skin basal cell carcinoma, cervical carcinoma in situ, and papillary thyroid carcinoma;
  6. Uncontrollable cardiac symptom or disease, such as (1) grade II or higher heart failure according to New York Heart Association (NYHA) cardiac function classification (2) unstable angina pectoris (3) myocardial infarction within one year (4) clinically significant supraventricular or ventricular arrhythmia requiring clinical intervention;
  7. Patients who need systemic therapy with corticosteroids (>10 mg/day prednisone) or other immunosuppressive agents within 14 days before taking the study drugs, are allowed to inhale or locally use steroid and adrenal hormone (>10 mg/day prednisone) as replacement therapy;
  8. Active infection requiring treatment;
  9. Congenital or acquired immune deficiency (such as HIV infection), active hepatitis B (HBV-DNA  $\geq 10^4$  copies/mL or 2000 IU/mL) or C (positive hepatitis C antibody, with HCV-RNA higher than the lower limit of detection range).
  10. With anti-cancer therapy at other oncology departments;
  11. With live vaccine within 4 weeks before receiving the study treatment;
  12. History of psychotropic drug abuse, or alcohol or drug abuse;
  13. Pregnant or lactating women;
  14. Other factors that may lead to midway withdrawal, such as other severe diseases (including mental disorders) requiring combination therapy, severe abnormalities of laboratory test values, family or social factors, and those may affect patient safety or data collection, as judged by the investigator;
  15. Patients with T4b oral, laryngeal or hypopharyngeal carcinoma, or P16 oropharyngeal carcinoma, or unresectable tumor as deemed by the surgeon;
  16. Active tuberculosis;
  17. Severe infection within 4 weeks before receiving the study treatment
-

|                   |                                                                                                                                                                                                                                                                                                                                                                                                                                                                                                                                                                                                                                                                                                                                                                                                                                                                                                                                                                                                                                                                                                                                                                                                               |
|-------------------|---------------------------------------------------------------------------------------------------------------------------------------------------------------------------------------------------------------------------------------------------------------------------------------------------------------------------------------------------------------------------------------------------------------------------------------------------------------------------------------------------------------------------------------------------------------------------------------------------------------------------------------------------------------------------------------------------------------------------------------------------------------------------------------------------------------------------------------------------------------------------------------------------------------------------------------------------------------------------------------------------------------------------------------------------------------------------------------------------------------------------------------------------------------------------------------------------------------|
|                   | <p>(including but not limited to hospitalization due to infection, bacteremia or complications of severe pneumonia);</p> <p>18. Prior systemic immunity stimulation drugs (including but not limited to interferon or interleukin-2) within 4 weeks before receiving the study treatment, or still within five drug half-lives (whichever was longer).</p>                                                                                                                                                                                                                                                                                                                                                                                                                                                                                                                                                                                                                                                                                                                                                                                                                                                    |
| Treatment Regimen | <p>Neoadjuvant immunotherapy: After enrollment, patients will be administered camrelizumab 200 mg once every three weeks for three times in total before surgery (days 1, 22 and 43, respectively). Camrelizumab will be given by intravenous infusion for 30 min (no less than 20 min and no more than 60 min).</p> <p>Neoadjuvant chemotherapy: After enrollment, patients will be administered chemotherapy (docetaxel combined with cisplatin [DP] or albumin-bound paclitaxel combined with cisplatin [AP]) for three 21-day cycles before surgery.</p> <p>Surgery: Surgery will be performed at one to four weeks after the completion of 9-week neoadjuvant therapy.</p> <p>Adjuvant radiotherapy: Adjuvant radiotherapy will be given at 4 weeks after surgery. Radiotherapy alone or concurrent chemoradiotherapy will be performed based on the postoperative pathological results. Irradiation dose: DT50Gy/25F radiotherapy alone at low-risk areas; 60Gy/30F for patients with positive margin; and 66-70Gy/33-35F on sites without residual tumor. Cisplatin combined with concurrent radiotherapy will be given to patients with positive margin or extracapsular invasion of lymph nodes.</p> |
| Endpoints         | <p>Primary endpoints:</p> <p>Pathological complete response (pCR) rate, and treatment-related adverse events (TRAEs) in accordance with Common Terminology Criteria for Adverse Events (CTCAE) version 4.0.</p> <p>Secondary endpoints:</p> <p>Major pathological response (MPR) rate, objective response rate (ORR), 2-year disease-free survival (DFS) rate, 2- and 5-year overall survival (OS) rates</p>                                                                                                                                                                                                                                                                                                                                                                                                                                                                                                                                                                                                                                                                                                                                                                                                  |
| Safety            | <p>Vital signs and laboratory indicators will be evaluated to determine adverse events (AEs) and serious AEs (SAEs).</p>                                                                                                                                                                                                                                                                                                                                                                                                                                                                                                                                                                                                                                                                                                                                                                                                                                                                                                                                                                                                                                                                                      |



---

The enrollment is expected to last for 24 months. Each patient will be followed until death or withdrawal from the study, or until the last patient has been followed for 24 months.

Date of the first enrolled patient / start of the study: July 1, 2019

Duration of Study

Date of the last enrolled patient: May 18, 2021

Date of the last patient to be withdrew / end of the study: May 18, 2023 (24 months after the last patient is enrolled)

Planned date to lock database: May 18, 2023

---

Case report form: Case report form (CRF) will be used to record data in this study. All data on each patient will be recorded in a timely and truthful manner. As original data, CRF cannot be modified. Corrections should be made after signing the name and date by the investigator. CRF is in duplicate, and kept by the statistician and investigator after the end of the study, respectively.

Establishment of database: After receiving the CRF, data manager will check the data and feedback the possible problems to the investigator. The investigator should verify the data and reply to the data manager as soon as possible. And then, data manager will establish a database and complete the data entry. After checking without mistakes, the database will be locked by the principal investigators, data manager and statistician. To ensure data security, unauthorized personals cannot get access or change data. All data must have backups. Any data change must be done after getting written consent from all the principal investigators, statistician and data manager.

Data Statistics

Analysis method: Descriptive analysis will be adopted to describe endpoints.

---

## List of Abbreviations

The abbreviations and special terms used in this protocol are listed below.

| <b>Abbreviation</b> | <b>Full Name</b>                                 |
|---------------------|--------------------------------------------------|
| AE                  | Adverse event                                    |
| AJCC                | American Joint Committee on Cancer               |
| ALT                 | Alanine aminotransferase                         |
| ANC                 | Absolute neutrophil count                        |
| AP                  | Albumin-bound paclitaxel combined with cisplatin |
| APM                 | Antigen processing machinery                     |
| APTT                | Activated partial thromboplastin time            |
| AST                 | Aspartate aminotransferase                       |
| BIL                 | Bilirubin                                        |
| BUN                 | Blood urea nitrogen                              |
| CI                  | Confidence interval                              |
| CPS                 | Combined positive score                          |
| Cr                  | Creatinine                                       |
| CR                  | Complete response                                |
| CRF                 | Case report form                                 |
| CT                  | Computed tomography                              |
| CTL                 | Cytotoxic T lymphocyte                           |
| CTCAE               | Common Terminology Criteria for Adverse Events   |
| ECOG                | Eastern Cooperative Oncology Group               |

| <b>Abbreviation</b> | <b>Full Name</b>                                       |
|---------------------|--------------------------------------------------------|
| ESMO                | European Society for Medical Oncology                  |
| Hb                  | Hemoglobin                                             |
| HLA                 | Human leukocyte antigen                                |
| HNSCC               | Head and neck squamous cell carcinoma                  |
| HR                  | Hazard ratio                                           |
| MHC                 | Main histocompatibility complex                        |
| MPR                 | Major pathological response                            |
| MRI                 | Magnetic resonance imaging                             |
| NCCN                | National Comprehensive Cancer Network                  |
| NSCLC               | Non-small cell lung cancer                             |
| NYHA                | New York Heart Association                             |
| ORR                 | Objective response rate                                |
| OS                  | Overall survival                                       |
| pCR                 | Pathological complete response                         |
| PD-L1               | Programmed cell death-ligand 1                         |
| PD-L2               | Programmed cell death-ligand 2                         |
| PD-1                | Programmed cell death-1                                |
| PFS                 | Progression-free survival                              |
| PLT                 | Platelet                                               |
| PR                  | Partial response                                       |
| RCCEP               | Reactive cutaneous capillary endothelial proliferation |

---

| <b>Abbreviation</b> | <b>Full Name</b>                             |
|---------------------|----------------------------------------------|
| RECIST              | Response Evaluation Criteria In Solid Tumors |
| TGF                 | Transforming growth factor                   |
| TPF                 | Docetaxel, cisplatin and 5-fluorouracil      |
| TPS                 | Tumor proportion score                       |
| TRAE                | Treatment-related adverse event              |
| ULN                 | Upper limit of normal                        |
| VEGF                | Vascular endothelial growth factor           |

---

## **1. Background**

### **1.1 Epidemiology of Head and Neck Squamous Cell Carcinoma (HNSCC)**

The head and neck cancer is a group of malignant tumors that occur in the upper respiratory tract and upper gastrointestinal tract (including oral cavity, oropharynx, hypopharynx, and larynx). Head and neck cancer is the sixth most common malignant cancer and the eighth most common cause of cancer death worldwide [1]. HNSCC is the most common pathological type, and 60%-70% of patients with HNSCC had locally advanced disease without distant metastasis at diagnosis. Currently, most hospitals adopted the comprehensive therapy by surgery combined with radiotherapy, chemotherapy and targeted therapy for the treatment of HNSCC [2]. However, the efficacy is not ideal with 2-year progression-free survival (PFS) rate less than 40% and 5-year overall survival (OS) rate about 20%-30% [3]. Local-regional recurrence is the main failure pattern after the comprehensive therapy for locally advanced HNSCC. The median survival of recurrent or metastatic HNSCC is only about 10 months after current standard treatment regimen [4]. Moreover, for patients with newly diagnosed locally advanced HNSCC, radical surgery with a wide range causes severe dysfunctions such as dysphonia, dysphagia, dyspnea, as well as physical defects and social difficulties, which seriously affects the quality of life of patients. Therefore, exploring more effective treatment regimens for locally advanced HNSCC has become a particularly urgent issue.

### **1.2 EXTREME Regimen is the Standard Treatment for Recurrent or Metastatic HNSCC**

About two-thirds of patients with newly-diagnosed HNSCC had stage III-IV disease. For these patients, multidisciplinary comprehensive treatment is required due to wide range of tumor invasion or cervical lymph node metastases. About 20%-40% of patients can be cured after reasonable surgery, radiotherapy and chemotherapy [5, 6], but most of the patients have to experience repeated surgery, radiotherapy and chemotherapy due to recurrence or metastasis, which severely decreases the quality of life. For patients with recurrent or metastatic HNSCC, EXTREME regimen (cetuximab plus platinum and fluorouracil) is recommended based on National Comprehensive Cancer Network (NCCN) Clinical Practice Guidelines. It improves the median survival by about 2 months compared with platinum plus fluorouracil, but the efficacy remains unsatisfactory [7].

### **1.3 Immunotherapy is Effective for Recurrent or Metastatic HNSCC**

With remarkable efficacy, cancer immunotherapy has been widely used in clinical practice in recent years. For example, the role of immunotherapy for metastatic melanoma is irreplaceable [8]. A series of studies on advanced non-small cell lung cancer (NSCLC) indicated that the efficacy of immunotherapy was significantly better than that of conventional chemotherapy for patients with tumor proportion score (TPS)  $\geq 50\%$  [9]. For patients with locally advanced NSCLC, if immunotherapy maintenance was used after standard concurrent chemoradiotherapy, the PFS was three times longer than that of control group [10].

HNSCC is a tumor with a high degree of immunodeficiency [11]. In an ideal state, the immune system performs an active killing effect by identifying tumor-associated antigens or specific antigens. Therefore, the tumor cells with low immunogenicity may escape immune surveillance and immune clearance. In HNSCC, inhibiting expression of anti-tumor antigens is the main mechanism of immune escape. Human leukocyte antigen (HLA) is the human body's main histocompatibility complex (MHC), which delivers signals between tumor antigen peptides and cytotoxic T lymphocytes (CTLs). In addition, the expression of anti-tumor antigens depends on antigen processing machinery (APM). Studies have shown that

HNSCC cells reduce the anti-tumor immunity of T cells by down-regulating the expression of HLA class I antigens, increasing the expression of programmed cell death-ligand 1 (PD-L1) and over-expressing transforming growth factor (TGF)-beta and vascular endothelial growth factor (VEGF) [12]. The above immune deficiency is common in HNSCC tumor microenvironment.

HNSCC has a relatively high mutation burden and immunotherapy has achieved good results in treating HNSCC. The European Society for Medical Oncology (ESMO) presented KEYNOTE-048 study on advanced HNSCC in 2018 [13]. The study compared the efficacy between anti-programmed cell death-1 (PD-1) antibody pembrolizumab and standard EXTREME regimen for patients with recurrent or metastatic HNSCC. The results showed that pembrolizumab was as effective as EXTREME regimen for the overall patients. For patients whose tumor expressed PD-L1 with combined positive score (CPS)  $\geq 20$  and  $\geq 1$ , pembrolizumab was more effective than EXTREME regimen (N=255; median: 14.9 vs 10.7 months; hazard ratio [HR]: 0.61 [95% CI 0.45-0.83]; P=0.0007; and N=512; median: 12.3 vs 10.3 months; HR: 0.78 [95% CI 0.64-0.96]; P=0.0086), with lower toxicity. The results provided high-level evidence for pembrolizumab as first-line treatment for recurrent or metastatic HNSCC.

Although the immunotherapy had better efficacy than conventional chemotherapy in the treatment of recurrent or metastatic HNSCC, the results remains unsatisfactory. In KEYNOTE-048 study, patients with CPS  $\geq 20$  only accounted for 44% of all patients; the overall effective rate was only 23.3% and the median PFS was 3.4 months; the median OS was only increased by 4.2 months.

Cancer immunotherapy before surgery may be more effective than adjuvant therapy after surgery and treatment for advanced disease. According to a clinical study on operable NSCLC [14], the overall response rate of immunotherapy was no higher than 20% in advanced disease, but reached 45% in the neoadjuvant setting, and the patients benefited from the therapy, regardless of PD-L1 expression. Another study has also shown that [15] neoadjuvant immunotherapy was effective for recurrent glioma which was once considered insensitive to immunotherapy. Some investigators discovered that for recurrent glioblastoma, if patient received pembrolizumab before the second surgery, the efficacy was better than that if he or she received pembrolizumab after surgery, with median survival of 412 days and 228 days, respectively. CheckMate 358 was a phase 1/2 clinical study of neoadjuvant immunotherapy for HNSCC [16]. Patients received surgery after nivolumab treatment for twice, and the results have shown that nearly half of HNSCC patients had tumor shrinkage (11/23) with response rate of 50% (5/10) in patients with HPV-positive disease and 46.3% (6/13) in those with HPV-negative disease. Time for surgery was not postponed as well.

The above studies on three tumors indicated that immunotherapy may have different efficacy in different stages during tumor development. Compared with the immunotherapy for patients with recurrent or metastatic advanced tumors, the neoadjuvant immunotherapy is more effective. Neoadjuvant immunotherapy has two advantages. First, compared with adjuvant therapy, neoadjuvant immunotherapy is easier to induce immunity system to produce anti-tumor immunity as the primary tumor provides the immune system with abundant tumor-associated antigens and tumor-specific antigens. Second, compared with salvage therapy or palliative therapy, it is easier to activate the anti-tumor immune response at early stage as the patients have better nutritional status and immune function than those experienced multiple therapies in the advanced setting. For patients with response, neoadjuvant immunotherapy can reduce the size of tumor, downstage the tumor, reduce the surgical damage and increase the rate of complete resection. More importantly, neoadjuvant immunotherapy produces anti-tumor immunity (activated

killer T cells) with an abscopal effect <sup>[16]</sup> to eliminate micrometastasis. Furthermore, the effector T cells featured with immunological surveillance to further reduce the recurrence and metastasis of tumors after surgery.

According to the studies on lung cancer and HNSCC, neoadjuvant immunotherapy with a single drug showed an effective rate of 45%-50%, much higher than 20% in the second-line setting. However, it also meant that about 50% of patients were not effectively treated before surgery, which delayed the time for surgery. Therefore, it is necessary to combine with other effective treatments.

#### **1.4 Higher Clinical and Pathological Response Rate Can be Achieved by Neoadjuvant Chemotherapy Combined with Anti-PD-1 Antibody**

The NADIM study of neoadjuvant immunotherapy combined with chemotherapy for NSCLC was a single-arm, open-label, multicenter phase 2 study, involving patients with resectable IIIA-N2 NSCLC <sup>[17]</sup>. Patients received chemotherapy combined with nivolumab, and then sequential surgery and adjuvant immunotherapy for one year. The neoadjuvant therapy included three cycles of 360 mg nivolumab IV Q3W combined with 200 mg/m<sup>2</sup> paclitaxel and carboplatin AUC6 IV Q3W. After neoadjuvant therapy, assessment was performed according to the Response Evaluation Criteria In Solid Tumors (RECIST). Surgery was carried out on the 3<sup>rd</sup> or 4<sup>th</sup> week after three cycles of neoadjuvant therapy. Adjuvant therapy included 240 mg nivolumab IV Q2W for 4 months and 480 mg nivolumab IV Q4W for 8 months. A total of 46 patients were included in this study. The primary endpoint was 24-month PFS rate, and objective pathological response was adopted for exploratory analysis of efficacy. In this study, 20 patients underwent surgery and their tumors were resectable. According to the assessment of overall clinical response, 10% of patients achieved complete response (CR) and 60% achieved partial response (PR). According to the assessment of pathological response after surgery, 13 patients (65.0%; 95% CI 40.8-84.6%) achieved pathological CR (pCR), and three (15.0%) achieved major pathological response (MPR) that was defined as patients with <10% viable tumor cells. The results suggested that if chemotherapy was combined with immunotherapy as neoadjuvant therapy for patients with resectable locally advanced NSCLC, the anti-tumor efficacy was remarkable and the pCR rate exceeded expectations. In a clinical study (NCT02716038) of atezolizumab combined with carboplatin and paclitaxel <sup>[18]</sup>, the pathological response rate after two cycles of neoadjuvant therapy was raised to 50%, of which 21.3% was pCR. The pathological response rate of these two clinical studies was significantly better than that of conventional neoadjuvant chemotherapy.

Currently, there are little clinical data on the neoadjuvant therapy of chemotherapy combined with anti-PD-1 antibody for locally advanced HNSCC. However, the KEYNOTE-048 study indicated that anti-PD-1 antibody alone as the first-line treatment for recurrent or metastatic HNSCC resulted in an effective rate of 16.9%, significantly lower than 36% with the EXTREME regimen. Chemotherapy combined with anti-PD-1 antibody was as effective as EXTREME regimen. Therefore, it is believed that neoadjuvant chemotherapy combined with immunotherapy before surgery is more effective than immunotherapy alone.

#### **1.5 Neoadjuvant Chemotherapy Combined with Immunotherapy May be an Optimal Regimen for Locally Advanced HNSCC**

A meta-analysis of MACH-NC study reported the impact of different sequential chemotherapy on the survival rate of patients with locally advanced HNSCC <sup>[19]</sup>. In this study, concurrent

chemoradiotherapy was the main regimen to improve the survival rate, but both neoadjuvant chemotherapy and adjuvant chemotherapy failed to improve the survival rate, because only two of the 31 included studies obtained survival benefit. However, these included studies were completed in early era with design limitations. Moreover, the survival benefit was observed in 15 subgroups where 5-fluorouracil combined with cisplatin was given. The recent clinical studies on stage III HNSCC, such as PARADIGM [20], DeCIDE [21], and GORTEC [22], also indicated that inductive chemotherapy failed to bring survival benefits. However, PARADIGM and DeCIDE did not complete the enrollment. Moreover, 10%, 8.8%, and 16.5% of patients in PARADIGM, DeCIDE and GORTEC studies, did not receive concurrent chemoradiotherapy after inductive chemotherapy, and the treatment-related mortality was 1.4%, 2.9%, and 6.6%, respectively. All these factors reduced the survival benefit of inductive chemotherapy. In addition, in Western countries, a large proportion of patients with HNSCC had HPV-positive oropharyngeal cancer, which was sensitive to chemoradiotherapy, with favorable prognosis after concurrent radiochemotherapy. However, patients with HPV-positive oropharyngeal cancer were uncommon in China. In the above three studies, patients received concurrent radiochemotherapy after inductive chemotherapy. However, HNSCC patients in China were more likely to select surgery. Therefore, it is still of practical importance to explore the role of neoadjuvant chemotherapy in the comprehensive treatment for locally advanced HNSCC in China.

According to the above clinical studies of inductive chemotherapy, patients with locally advanced HNSCC were more sensitive to chemotherapy, and neoadjuvant chemotherapy alone could achieve a response rate of about 70%. The efficacy may be better if it was combined with immunotherapy.

## **1.6 Clinical Study Progress on Camrelizumab**

Camrelizumab (SHR-1210) developed by Jiangsu Hengrui Pharmaceuticals Co., Ltd. is a humanized anti-human PD-1 monoclonal antibody. Multiple screening tests have shown that camrelizumab can bind to humanized PD-1 with high affinity and high specificity, and can effectively block PD-1 to bind to its ligand PD-L1 or PD-L2 at the protein and cell levels. Various in vitro experiments have confirmed that camrelizumab efficiently activated human immune cells. In a humanized PD-1 transgenic mouse model of tumor, camrelizumab effectively inhibited the growth of colon cancer and melanoma with a significant anti-tumor rate. The crystal structure and characterization analysis showed that the binding epitope of camrelizumab to human PD-1 was different from that of similar products, laying the foundation for its proprietary intellectual property rights.

Many clinical studies have been done on camrelizumab. The phase 2 and multicenter study of camrelizumab as the second- or latter-line treatment for Chinese patients with advanced hepatocellular carcinoma [23], led by Professor Shukui Qin and Professor Zhenggang Ren, was announced as late-breaking abstract at the ESMO Annual Meeting in October 2018. The results showed that the objective response rate (ORR) reached 13.8%, and the 6-month OS rate was 74.7%. Two phase 1 studies of camrelizumab explored the efficacy and safety of camrelizumab as the second-line treatment and camrelizumab combined with chemotherapy as the first-line treatment for patients with recurrent or metastatic nasopharyngeal carcinoma. According to the results, the ORR in the second-line treatment was 34%; but it was up to 91% in the first-line treatment and the disease control rate reached 100% [24]. In December 2014, Jiangsu Hengrui Pharmaceuticals Co., Ltd. submitted a clinical trial application for camrelizumab, and was approved by China Food and Drug Administration in February 2016. In November 2016, phase 2 and 3 clinical trials were approved. In May 2019, camrelizumab was approved



by China Food and Drug Administration for sales.

Therefore, neoadjuvant chemotherapy combined with immunotherapy (camrelizumab) is used for patients with locally advanced HNSCC in this study, aiming to ensure an effective anti-tumor treatment before surgery and obtain better efficacy.

## **2. Study Profile**

### **2.1 Purpose**

The purpose of this study is to observe and evaluate safety and efficacy of neoadjuvant chemotherapy combined with anti-PD-1 antibody in the treatment of locally advanced HNSCC.

### **2.2 Primary Endpoints**

The primary endpoints include pCR rate, and treatment-related adverse events (TRAEs) in accordance with Common Terminology Criteria for Adverse Events (CTCAE) version 4.0.

### **2.3 Secondary Endpoints**

The secondary endpoints include MPR rate, ORR, 2-year disease-free survival (DFS) rate, 2-year OS rate and 5-year OS rate.

### **2.4 Enrolled population**

Patients with operable locally advanced HNSCC (oral cavity, oropharynx, hypopharynx or larynx).

## **3. Subject Selection and Withdrawal**

### **3.1 Inclusion Criteria**

1. Age between 18 and 70 years;
2. Histologically diagnosed with squamous cell carcinoma of the oral cavity, oropharynx, hypopharynx or larynx, and resectable tumor evaluated by a head and neck surgeon prior to enrollment;
3. High-risk disease according to the 8th edition of American Joint Committee on Cancer (AJCC) guideline:
  - Non-oropharyngeal HNSCC cancer and HPV-negative oropharyngeal cancer, stage III, IVA and IVB;
  - HPV-positive oropharyngeal cancer, stage II and III;HPV status for oropharyngeal cancer was determined by p16 immunohistochemistry.
4. No prior anti-cancer therapy for HNSCC;
5. At least one evaluable target lesion according to RECIST 1.1;
6. Eastern Cooperative Oncology Group (ECOG) performance status 0-1;
7. Normal major organ function in accordance with the following criteria:

(1) Blood routine examination: (no blood transfusion within 14 days)

- a. Hemoglobin (Hb)  $\geq 90$  g/L;
- b. Absolute neutrophil count (ANC)  $\geq 1.5 \times 10^9$ /L;
- c. Platelet (PLT)  $\geq 80 \times 10^9$ /L;

(2) Blood biochemistry

- a. Bilirubin (BIL)  $< 1.25 \times$  the upper limit of normal (ULN);
- b. Alanine aminotransferase (ALT) and aspartate aminotransferase (AST)  $< 2.5 \times$ ULN; for patients with liver metastasis, ALT and AST  $< 5 \times$ ULN;
- c. Serum creatinine (Cr)  $\leq$ ULN and endogenous creatinine clearance  $> 50$  mL/min (Cockcroft-Gaut formula);

8. Written informed consent before enrollment;

9. Patients who can adhere to study protocol, as judged by the investigator;

10. Negative pregnancy test result for fertile female patients;

11. Male patients and fertile female patients must agree to use two kinds of contraceptive measures (including at least one highly effective measure) during the whole study period.

Infertile female patients are those meeting at least one of the following criteria:

-Documented hysterectomy and/or bilateral oophorectomy;

-Medical confirmed ovarian function decline;

-Postmenopausal status, defined as cessation of menstruation for at least 12 consecutive months without pathological or physiological reasons, with serum follicle-stimulating hormone level in accordance with post-menopausal status.

12. Patients who are willing and able to adhere to follow-up, treatment plan, laboratory test and other study procedures.

### **3.2 Exclusion Criteria**

1. Prior immunotherapy with anti-PD-1, anti-PD-L1, anti-PD-L2, anti-CD137, anti-CTLA-4 antibody, or any other antibodies or drug that specifically targeted T cell co-stimulation or immune checkpoint pathways;

2. Major surgery within 4 weeks before enrollment;

3. Allergy to anti-PD-1 antibody or its excipients;

4. Any active autoimmune disease or history of autoimmune disease, such as interstitial pneumonia, uveitis, enteritis, hepatitis, hypophysitis, vasculitis, myocarditis, nephritis, hyperthyroidism, hypothyroidism (patients can be enrolled after effective hormone replacement therapy) and so on. Patients with vitiligo, or those with asthma that had been completely relieved in childhood without intervention after adulthood or only require medical intervention with bronchodilators, can be enrolled;

5. Other malignant tumors, except for those who had been cured with tumor-free survival more than 5 years, such as skin basal cell carcinoma, cervical carcinoma in situ, and papillary thyroid carcinoma;
6. Uncontrollable cardiac symptom or disease, such as (1) grade II or higher heart failure according to New York Heart Association (NYHA) cardiac function classification (2) unstable angina pectoris (3) myocardial infarction within one year (4) clinically significant supraventricular or ventricular arrhythmia requiring clinical intervention;
7. Patients who need systemic therapy with corticosteroids (>10 mg/day prednisone) or other immunosuppressive agents within 14 days before taking the study drugs, are allowed to inhale or locally use steroid and adrenal hormone (>10 mg/day prednisone) as replacement therapy;
8. Active infection requiring treatment;
9. Congenital or acquired immune deficiency (such as HIV infection), active hepatitis B (HBV-DNA  $\geq 10^4$  copies/mL or 2000 IU/mL) or C (positive hepatitis C antibody, with HCV-RNA higher than the lower limit of detection range);
10. With anti-cancer therapy at other oncology departments;
11. With live vaccine within 4 weeks before receiving the study treatment;
12. History of psychotropic drug abuse, or alcohol or drug abuse;
13. Pregnant or lactating women;
14. Other factors that may lead to midway withdrawal, such as other severe diseases (including mental disorders) requiring combination therapy, severe abnormalities of laboratory test values, family or social factors, and those may affect patient safety or data collection, as judged by the investigator;
15. Patients with T4b oral, laryngeal or hypopharyngeal carcinoma, or P16 oropharyngeal carcinoma, or unresectable tumor as deemed by the surgeon;
16. Active tuberculosis;
17. Severe infection within 4 weeks before receiving the study treatment (including but not limited to hospitalization due to infection, bacteremia or complications of severe pneumonia);
18. Prior systemic immunity stimulation drugs (including but not limited to interferon or interleukin-2) within 4 weeks before receiving the study treatment, or still within five drug half-lives (whichever was longer).

### **3.3 Withdrawal Criteria**

Patients may be withdrawn from the study due to the following reasons:

1. Withdrawal of consent and refusal of further follow-up;
2. Any clinical adverse reactions, laboratory test abnormalities or concurrent diseases, not in accordance with best benefit if patients continue the study, as judged by the investigator;
3. Any other conditions judged by the investigator. For example, patients lose their ability to freely express their will due to incarceration or isolation.

#### 4. Disease progression by imaging examinations;

The first progression by RECIST 1.1 needs to be confirmed 4-6 weeks later (except for patients with rapid progression or significantly clinical progression);

Patients with confirmed progression can continue the study treatment until second radiographic progression if the clinical symptoms are stable (a. no significantly clinical symptoms or changes in laboratory indicators; b. no deterioration in ECOG performance status; c. Non-rapid progression or progression with no involvement of vital organs/sites [such as spinal cord compression]);

#### 5. Loss to follow-up;

#### 6. Death;

#### 7. Termination of the study by the sponsor.

### **Withdrawal procedures:**

The investigators should ask about the reasons and the adverse events that occurred when the patient decided to withdraw from the study. If possible, they should observe and evaluate this patient. When the patient suffered from serious or unexpected adverse reactions, the investigator should follow up. Once the patient withdrew from the study, the investigator should try to obtain the patient's information. Moreover, the investigator should try to complete final evaluation and record their efforts. The evaluations, observations, along with patient's reasons for withdrawal from the study, must be recorded in the original data. Patient's reasons for withdrawal from the study must be recorded in the case report form (CRF) as well, and the subsequent procedures (discharge follow-up) must be completed as much as possible.

### **3.4 Treatment Discontinuation Criteria**

Discontinuation of the study treatment doesn't mean withdrawal from the study. Patients who discontinue the study treatment must continue the follow-up as per the protocol.

Patients must discontinue the study treatment if they meet one of the following criteria:

1. Patients ask to discontinue the study treatment;
2. When imaging examinations or clinical characteristics demonstrate disease progression, patients should discontinue the study treatment unless they meet the criteria of continuing treatment after progression;
3. Pregnancy during the study period;
4. Any clinical adverse events, laboratory tests abnormalities or other medical conditions, leading to no more benefits for patients;
5. Patients cannot continue the study due to the general deterioration of health status;
6. Loss to follow-up;
7. Death;
8. Other reasons judged by the investigator;

### **3.5 Early Termination or Suspension of Study**

The study can be early terminated or suspended for the right reason. This may be due to change in decision by ethics committee, or efficacy or safety issues of the study drugs. The personnel or organization who decide to suspend/terminate the study needs to send written notice with recorded reason

to the investigators. The investigators need to inform the ethics committee and explain the reason.

The study may be early terminated or suspended due to the following reasons:

1. Confirmed unexpected, significant, or unacceptable risk;
2. Current efficacy results supporting early termination;
3. Confirmed ineffective study drugs;
4. Major mistake found during the study period;
5. Difficulty in completing the study and low compliance to the study protocol due to slow enrollment, protocol deviations or other reasons;
6. Incomplete or unavailable data;
7. Study results with no values.

## **4. Treatment Regimen**

### **4.1 Neoadjuvant Immunotherapy**

After enrollment, patients will be administered camrelizumab 200 mg once every three weeks for three times in total before surgery (days 1, 22 and 43, respectively). Camrelizumab will be given by intravenous infusion for 30 min (no less than 20 min and no more than 60 min).

### **4.2 Neoadjuvant Chemotherapy**

After enrollment, patients will be administered chemotherapy (docetaxel combined with cisplatin [DP] or albumin-bound paclitaxel combined with cisplatin [AP]) for three 21-day cycles before surgery.

### **4.3 Surgery**

Surgery will be performed at one to four weeks after the completion of 9-week neoadjuvant therapy. Surgical delay was defined as the delay in the planned surgery of no more than 49 days after the first day of the third treatment cycle.

### **4.4 Adjuvant Radiotherapy**

Adjuvant radiotherapy will be given at 4 weeks after surgery. Radiotherapy alone or concurrent chemoradiotherapy will be performed based on the postoperative pathological results. Irradiation dose: DT50Gy/25F radiotherapy alone at low-risk areas; 60Gy/30F for patients with positive margin; and 66-70Gy/33-35F on sites without residual tumor. Cisplatin combined with concurrent radiotherapy will be given to patients with positive margin or extracapsular invasion of lymph nodes.

### **4.5 Follow-up**

Regular follow-up was performed after patients completed the treatment.

**Study Flowchart**

| Stage                                           | Screening | Noadjuvant therapy                                    | Surgery   | Adjuvant therapy                    |                                                      |                  | Follow-up                                                                                               |          | Study completion or early termination |
|-------------------------------------------------|-----------|-------------------------------------------------------|-----------|-------------------------------------|------------------------------------------------------|------------------|---------------------------------------------------------------------------------------------------------|----------|---------------------------------------|
|                                                 |           | PD-1 + Chemotherapy for 3 cycles (days 1, 22, and 43) | Day 64-91 | Margin-negative: radiotherapy alone | Margin-positive: concurrent chemoradiotherapy + PD-1 | Safety follow-up | Survival follow-up (every 90 days for the first two years, and every 180 days for the next three years) |          |                                       |
| Time window                                     |           | Q3W (±3 days)                                         |           | ±7 days                             | ±3 days                                              | Q3W (±3 days)    | ±7 days                                                                                                 | ±15 days |                                       |
| Collection of medical history                   |           |                                                       |           |                                     |                                                      |                  |                                                                                                         |          |                                       |
| Determination of inclusion / exclusion criteria | √         |                                                       |           |                                     |                                                      |                  |                                                                                                         |          |                                       |
| Written informed                                | √         |                                                       |           |                                     |                                                      |                  |                                                                                                         |          |                                       |

|                                                |   |   |   |   |   |   |   |   |   |
|------------------------------------------------|---|---|---|---|---|---|---|---|---|
| consent                                        |   |   |   |   |   |   |   |   |   |
| Baseline questionnaire (smoking history, etc.) | √ |   |   |   |   |   |   |   |   |
| Past medical history and treatment history     | √ |   |   |   |   |   |   |   |   |
| Concomitant drugs and accompanying diseases    | √ | √ | √ | √ | √ | √ | √ | √ | √ |
| <b>Diagnosis and efficacy indicators</b>       | √ |   |   |   |   |   |   |   |   |
| Tumor tissue specimen                          | √ |   |   |   |   |   |   |   |   |
| Physical examination                           | √ | √ | √ | √ | √ | √ | √ | √ | √ |

|                                              |   |     |                |   |   |     |   |   |   |
|----------------------------------------------|---|-----|----------------|---|---|-----|---|---|---|
| Locally enhanced MRI                         | √ | Q6W | Before surgery | √ | √ | Q6W |   | √ | √ |
| Liver ultrasound                             |   |     |                |   |   |     |   | √ | √ |
| Chest enhanced CT or PET-CT                  | √ |     |                |   |   |     | √ | √ | √ |
| KPS GPA score                                | √ | √   | √              | √ | √ | √   | √ | √ | √ |
| Quality of Life Scale                        | √ | √   | √              | √ | √ | √   | √ | √ | √ |
| Hematuria routine; liver and kidney function | √ | √   | √              | √ | √ | √   | √ | √ | √ |
| Lymphocyte subpopulation                     | √ | Q6W |                | √ | √ |     | √ |   |   |
| Six tests for cytokines                      | √ | Q6W |                | √ | √ |     | √ |   |   |
| Electrocardiogram                            | √ | √   | √              | √ | √ | √   | √ | √ | √ |





## 5. Sample Size

This study used a single-arm design. NCSS PASS 15 (LLC. Kaysville, Utah, USA, [ncss.com/software/pass](http://ncss.com/software/pass)) was used for sample size calculation. According to previous reports, the pCR rate with docetaxel, cisplatin and 5-fluorouracil (TPF) for resectable locally advanced HNSCC was 13.4%. Based on the early data of the study treatment, the estimated pCR rate with camrelizumab plus inductive chemotherapy for resectable locally advanced HNSCC was 34%. Assuming an one-sided  $\alpha$  of 0.025 and power of 80%, 27 patients were needed in this study. Considering a dropout rate of 10%, the calculation yielded 30 patients.

## 6. Grading and Treatment of Toxicity

### 6.1 Definition of Clinically Significant Toxicity

1. Grade 4 hematological toxicity, grade  $\geq 3$  thrombocytopenia accompanied with bleeding, or grade  $\geq 3$  neutropenia accompanied with fever and infection;
2. Grade 3 or above non-hematological toxicity (except for abnormal laboratory test indicators), hypertension, rash, diarrhea, nausea and vomiting that cannot be controlled after symptomatic treatment;
3. Grade 3 or above abnormal laboratory test indicators that require medical intervention, lead to hospitalization, or last 7 days or more;
4. Discontinuation of camrelizumab for more than 14 days due to related toxicity (during the first cycle or dose delay at the second cycle);

Definition of patients who do not complete tolerability evaluation: during the tolerability observation period, the dosage of camrelizumab was less than 90% of prescribed dose due to non-clinically significant toxicity (such as injection reaction, etc.).

Treatment for adverse events (AEs)

1. Reactive cutaneous capillary endothelial proliferation (RCCEP) - grading and treatment recommendations

Based on clinical observations and expert opinions, together with skin-related adverse reactions caused by immunotherapy as specified in ESMO guidelines, the grading and treatment recommendations for RCCEP are listed as follows:

| RCCEP   | Manifestation                                                                         | Treatment recommendations                                                                                    |
|---------|---------------------------------------------------------------------------------------|--------------------------------------------------------------------------------------------------------------|
| Grade 1 | Multiple or single nodule(s) with a maximum diameter of $\leq 10$ mm, with or without | Study treatment can be continued. For patients with ulceration and bleeding, local treatment is strengthened |

|                |                                                                                                               |                                                                                                                                                                                                                                                                                  |
|----------------|---------------------------------------------------------------------------------------------------------------|----------------------------------------------------------------------------------------------------------------------------------------------------------------------------------------------------------------------------------------------------------------------------------|
|                | ulceration and bleeding                                                                                       | to prevent infection.                                                                                                                                                                                                                                                            |
| <b>Grade 2</b> | Multiple or single nodule(s) with a maximum diameter of $\geq 10$ mm, with or without ulceration and bleeding | Study treatment can be continued. Observation or local treatment, such as laser or surgical resection, can be taken if necessary. For patients with ulceration and bleeding, local treatment is strengthened to prevent infection.                                               |
| <b>Grade 3</b> | Generalized nodules throughout the body, complicated with skin infection                                      | Study treatment needs to be interrupted and resumed only after the RCCEP recover to grade 1 or lower. Observation or local treatment, such as laser or surgical resection, can be taken if necessary. For patients with concurrent infection, anti-infective treatment is given. |

Note:

1. No grading is specified for grade 4 life-threatening RCCEP and grade 5 death because they did not occur in the study.
2. RCCEP is a unique adverse reaction caused by immunotherapy. Extending the treatment interval may reduce the severity and occurrence range. Now, there remains no effective preventive measures. Therefore, it is necessary to closely observe the growth and surface changes of the nodules. When it is ulcerated, Yunnan white powder is given, and if necessary, antibiotic ointment is given to prevent infection.

## 6.2 Treatment for Other Immune-related AEs

| <b>Immune-related AEs</b> | <b>Treatment recommendations</b>                                                                                                                                                                                                                                                                                                                       |
|---------------------------|--------------------------------------------------------------------------------------------------------------------------------------------------------------------------------------------------------------------------------------------------------------------------------------------------------------------------------------------------------|
| <b>Grade 1</b>            | Immunotherapy can be continued.                                                                                                                                                                                                                                                                                                                        |
| <b>Grade 2</b>            | Immunotherapy needs to be interrupted and resumed only after immune-related AEs recover to grade 1 or lower. If the symptoms last for more than one week, corticosteroids (0.5-1 mg/kg/day of prednisone or equivalent) should be given.                                                                                                               |
| <b>Grade 3/4</b>          | High-dose corticosteroids (1-2 mg/kg/day of prednisone or equivalent) should be given, and dose can be reduced after immune-related AEs recover to grade 1 or lower. Appropriate drug prevention from pneumocystis carinii pneumonia should be given for patients who have been treated with prednisone 20 mg or equivalent dose for at least 4 weeks. |
| <b>Symptoms still</b>     | Immunosuppressant replacement therapy should be used, such as infliximab 5                                                                                                                                                                                                                                                                             |

---

**exist after at** mg/kg or mycophenolate mofetil (for hepatitis). If the symptoms last 2 weeks or **least 3 days of** more, infliximab 5 mg/kg should be given again.  
**intravenous**  
**corticosteroids**

---

**Grade** 4 Immunotherapy needs to be terminated immediately (unless for endocrinopathy which can be controlled by hormone replacement therapy). Part of patients with **toxicity** grade 3 immune-related AEs can resume the immunotherapy.

---

Immunotherapy also needs to be terminated when the following situations occur:

1. Grade 2 immune-related AEs last 6 weeks or more. However, if endocrinopathy of patients treated with PD-1/PD-L1 inhibitors can be controlled by hormone replacement therapy, the immunotherapy can be continued;
2. Patients treated with CTLA-4 inhibitor cannot reduce the dose of corticosteroids to 7.5 mg or less (prednisone); or patients treated with PD-1/PD-L1 inhibitor cannot reduce the dose of corticosteroids to 10 mg/day or less within 12 weeks;
3. Grade 2-4 ocular toxicities which cannot be improved to grade 1 or lower after 2 weeks of systemic therapy or local immunosuppressant treatment.

## **7. Data Management**

### **7.1 Case Report Form**

CRF will be used to record data in this study. All data on each patient will be recorded in a timely and truthful manner. As original data, CRF cannot be modified. Corrections should be made after signing the name and date by the investigator. CRF is in duplicate, and kept by the statistician and investigator after the end of the study, respectively.

### **7.2 Establishment of Database**

After receiving the CRF, data manager will check the data and feedback the possible problems to the investigator. The investigator should verify the data and reply to the data manager as soon as possible. And then, data manager will establish a database and complete the data entry. After checking without mistakes, the database will be locked by the principal investigators, data manager and statistician. To ensure data security, unauthorized personals cannot get access or change data. All data must have backups. Any data change must be done after getting written consent from all the principal investigators, statistician and data manager.

### **7.3 Analysis Method**

Descriptive analysis will be adopted to describe endpoints.

## **8. Ethic Regulations and Informed Consent**

### **8.1 Ethic Regulations**

This clinical study should be strictly conducted in accordance with Declaration of Helsinki and Good

Clinical Practice by the State Food and Drug Administration. Before the start of the study, it must be approved by the ethics committee. During the study, any modifications should be approved by the ethics committee.

## **8.2 Informed Consent**

All patients must sign a written informed consent form before enrollment to protect the legal rights and interests. The investigators have the responsibility to fully and comprehensively introduce the purpose of the study, drug actions, the possible side effects and risks to the patients or their legal representatives, so that they know their rights, risks and benefits. Conversation is a very important informed consent process. If the patient and his or her legal representative have no reading ability, a witness shall participate in the informed consent process. After verbal agreement, the patient and his or her legal representative shall sign the informed consent form. The copy of the informed consent form and the contact information of the investigators and the ethics committee must be provided to the patients if required.

## **References**

1. Siegel R L, Miller K D, Jemal A. Cancer statistics, 2019[J]. CA: A Cancer Journal for Clinicians, 2019, 69(1).
2. Winquist E, Agbassi C, Meyers B M, et al. Systemic therapy in the curative treatment of head-and-neck squamous cell cancer: Cancer Care Ontario clinical practice guideline[J]. Current Oncology, 2017, 24(2):e157.
3. Budach V. Comprehensive Overview: Definitive Radiotherapy and Concurrent Chemoradiation in Locally Advanced Head and Neck Cancer[M]// Critical Issues in Head and Neck Oncology. 2017.
4. Ouhajjou A, Fadoukhair Z, Faouzi H. PO-059: Efficacy and safety of modified-increased FEP regimen and chemo-radiation for locally advanced HNSCC[J]. Radiotherapy and Oncology, 2017, 122:30.
5. Lorch JH, Goloubeva O, Haddad RI, et al. Induction chemotherapy with cisplatin and fluorouracil alone or in combination with docetaxel in locally advanced squamous-cell cancer of the head and neck: long-term results of the TAX 324 randomised phase 3 trial. Lancet Oncol. 2011; 12 (2) : 153-159.
6. Vermorken JB, Remenar E, van Herpen C, et al. Cisplatin, fluorouracil, and docetaxel in unresectable head and neck cancer. N Engl J Med. 2007; 357 (17) : 1695-1704.
7. Platinum-Based Chemotherapy plus Cetuximab in Head and Neck Cancer[J]. New England Journal of Medicine, 2008, 359(11):1116-1127.
8. Pasquali S, Chiarion-Sileni V, Rossi C R, et al. Immune checkpoint inhibitors and targeted therapies for metastatic melanoma: A network meta-analysis[J]. Cancer Treatment Reviews, 2017, 54:34-42.
9. Leena Gandhi, Delvys Rodríguez-Abreu, et al. Pembrolizumab plus Chemotherapy in Metastatic Non-Small-Cell Lung Cancer. N Engl J Med 2018; 378:2078-2092.
10. Antonia S, Villegas A, Daniel D, et al. Overall survival with durvalumab after chemoradiotherapy in

stage III NSCLC . N Eng J Med. 2018; 379:2342-2350.

11. Duray A, Demoulin S, Hubert P, et al. Immune Suppression in Head and Neck Cancers: A Review[J]. *Clinical & Developmental Immunology*, 2010, 2010(1):701657.

12. Ogino, T. HLA Class I Antigen Down-regulation in Primary Laryngeal Squamous Cell Carcinoma Lesions as a Poor Prognostic Marker[J]. *Cancer Research*, 2006, 66(18):9281-9289.

13. Burtneß B, Harrington K J, Greil R, et al. LBA8\_PRKEYNOTE-048: Phase III study of first-line pembrolizumab (P) for recurrent/metastatic head and neck squamous cell carcinoma (R/M HNSCC)[J]. *Annals of Oncology*.

14. Forde P M, Chaft J E, Smith K N, et al. Neoadjuvant PD-1 Blockade in Resectable Lung Cancer[J]. *N Engl J Med*, 2018, 378(21):1976-1986.

15. Timothy F. Cloughesy et al. Neoadjuvant anti-PD-1 immunotherapy promotes a survival benefit with intratumoral and systemic immune responses in recurrent glioblastoma, *Nature Medicine* .2019;(25):477–486

16. Ferris R, Gonçalves A, Baxi S, et al. An open-label, multicohort, phase 1/2 study in patients with virus-associated cancers (CheckMate 358): Safety and efficacy of neoadjuvant nivolumab in squamous cell carcinoma of the head and neck (SCCHN). Presented at ESMO 2017 Congress; September 8-12, 2017; Madrid, Spain. Abstract LBA46.

17. Provencio-Pulla M, Nadal-Alforja E, Cobo M, et al. Neoadjuvant chemo/immunotherapy for the treatment of stages IIIA resectable non-small cell lung cancer (NSCLC): A phase II multicenter exploratory study—NADIM study-SLCG[J]. *Journal of Clinical Oncology*, 2018, 36, 8521. DOI: 10.1200/JCO.2018.36.15\_suppl.8521

18. Shu C A, Grigg C, Chiuzan C, et al. Neoadjuvant atezolizumab+ chemotherapy in resectable non-small cell lung cancer (NSCLC)[J]. *Journal of Clinical Oncology*, 2018, 36, 8532. DOI: 10.1200/JCO.2018.36.15\_suppl.8532

19. Blanchard P, Landais C, Petit C, et al. Meta-analysis of chemotherapy in head and neck cancer (MACH-NC): An update on 100 randomized trials and 19,248 patients, on behalf of MACH-NC group[J]. *Annals of Oncology*, 2016, 27(suppl\_6).

20. Haddad R, O'Neill A, Rabinowits G, et al. Induction chemotherapy followed by concurrent chemoradiotherapy (sequential chemoradiotherapy) versus concurrent chemoradiotherapy alone in locally advanced head and neck cancer (PARADIGM): a randomised phase 3 trial. *Lancet Oncol* 2013;14:257–264.

21. Cohen EE, Karrison TG, Kocherginsky M, et al. Phase III randomized trial of induction chemotherapy in patients with N2 or N3 locally advanced head and neck cancer. *J Clin Oncol* 2014;32:2735–2743.

22. Geoffrois L, Martin L, De R D, et al. Induction Chemotherapy Followed by Cetuximab Radiotherapy Is Not Superior to Concurrent Chemoradiotherapy for Head and Neck Carcinomas: Results of the GORTEC 2007-02 Phase III Randomized Trial[J]. *Journal of Clinical Oncology Official Journal of the American Society of Clinical Oncology*, 2018:JCO2017762591.

23. Qin S K , Ren Z G , Meng Z Q , et al. LBA27A randomized multicentered phase II study to evaluate SHR-1210 (PD-1 antibody) in subjects with advanced hepatocellular carcinoma (HCC) who failed or intolerable to prior systemic treatment[J]. *Annals of Oncology*, 2018, 29(suppl\_8).
24. Fang W, Yang Y, Ma Y, et al. Camrelizumab (SHR-1210) alone or in combination with gemcitabine plus cisplatin for nasopharyngeal carcinoma: results from two single-arm, phase 1 trials. *Lancet Oncol.* 2018 Oct;19(10):1338
