# Supplementary material for: Neoadjuvant Chemoimmunotherapy for the Treatment of Locally Advanced Head and Neck Squamous Cell Carcinoma: A Single-Arm Phase 2 Clinical Trial
Source: PubMed Central journal article supplement — Clin Cancer Res. 2022 Jun 29;28(15):3268–76. doi: 10.1158/1078-0432.CCR-22-0666 (PMC9662919; doi:10.1158/1078-0432.ccr-22-0666), 2022-06-29

**Supplementary Fig. S1. European Organization for Research and Treatment of Cancer Quality of Life Questionnaire (EORTC QLQ-C30) scores and self-rating depression scale (SDS) scores at different time points. RT, radiation therapy.**

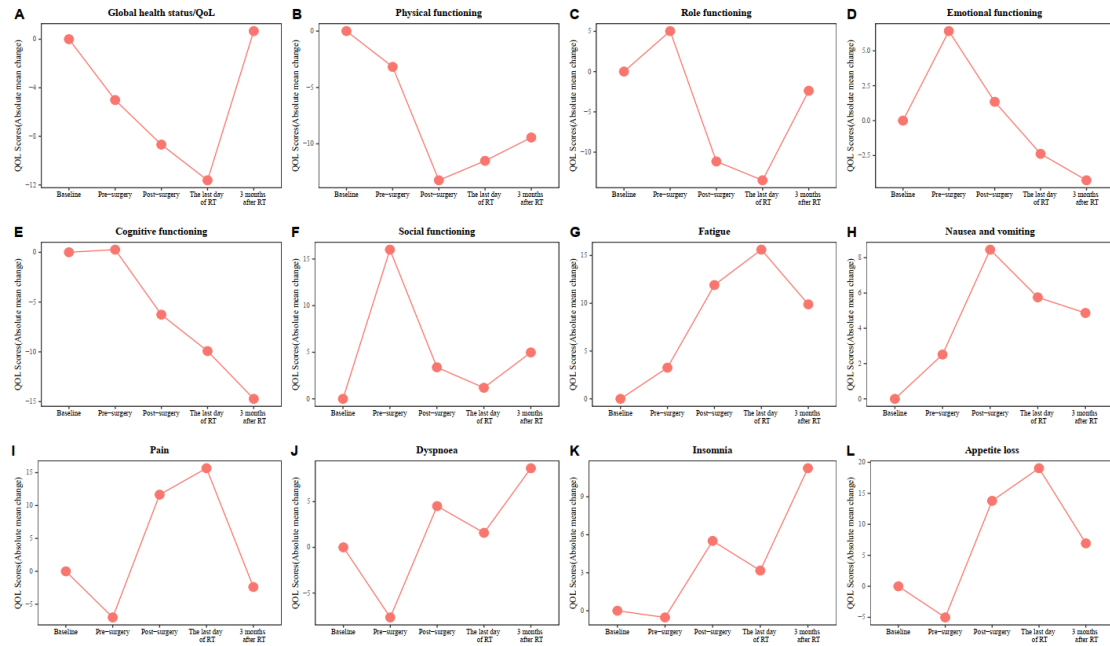

Supplement: ccr-22-0666_supplementary_fig.s1_suppfs1.pdf [file ccr-22-0666_supplementary_fig.s1_suppfs1.pdf]
