# Supplementary material for: Neoadjuvant Chemoimmunotherapy for the Treatment of Locally Advanced Head and Neck Squamous Cell Carcinoma: A Single-Arm Phase 2 Clinical Trial
Source: PubMed Central journal article supplement — Clin Cancer Res. 2022 Jun 29;28(15):3268–76. doi: 10.1158/1078-0432.CCR-22-0666 (PMC9662919; doi:10.1158/1078-0432.ccr-22-0666), 2022-06-29

**Supplementary Fig. S2. Relationships between pretreatment PD-L1 expression in primary patient samples and pathological responses associated with neoadjuvant chemoimmunotherapy.** Combined positive score (CPS) before treatment were plotted for patients with pathological complete response (pCR) (n=5), major pathological response (MPR) (n=9), and incomplete pathological response (IPR) (n=8). A, pCR vs IPR. B, MPR vs IPR. C, pCR + MPR vs IPR. *P*-values were determined using Mann–Whitney test.

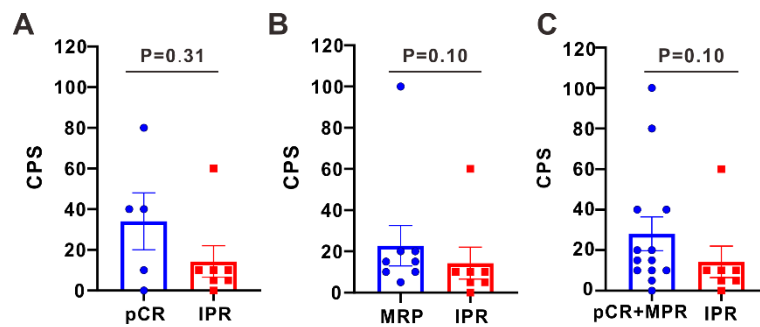

Supplement: ccr-22-0666_supplementary_fig.s2_suppfs2.pdf [file ccr-22-0666_supplementary_fig.s2_suppfs2.pdf]
