# Supplementary material for: Neoadjuvant Chemoimmunotherapy for the Treatment of Locally Advanced Head and Neck Squamous Cell Carcinoma: A Single-Arm Phase 2 Clinical Trial
Source: PubMed Central journal article supplement — Clin Cancer Res. 2022 Jun 29;28(15):3268–76. doi: 10.1158/1078-0432.CCR-22-0666 (PMC9662919; doi:10.1158/1078-0432.ccr-22-0666), 2022-06-29

**Supplementary Fig. S4. Relationships between pretreatment plasma cytokine levels and pathological responses associated with neoadjuvant chemoimmunotherapy.** Plasma levels of cytokines before treatment were plotted for patients with pathological complete response (pCR) (n=9), major pathological response (MPR) (n=9), and incomplete pathological response (IPR) (n=5). A, IL-2. B, IL-4. C, IL-6. D, IL-10. E, TNF- $\alpha$ . F, IFN- $\gamma$ . *P*-values were determined using Mann–Whitney test.

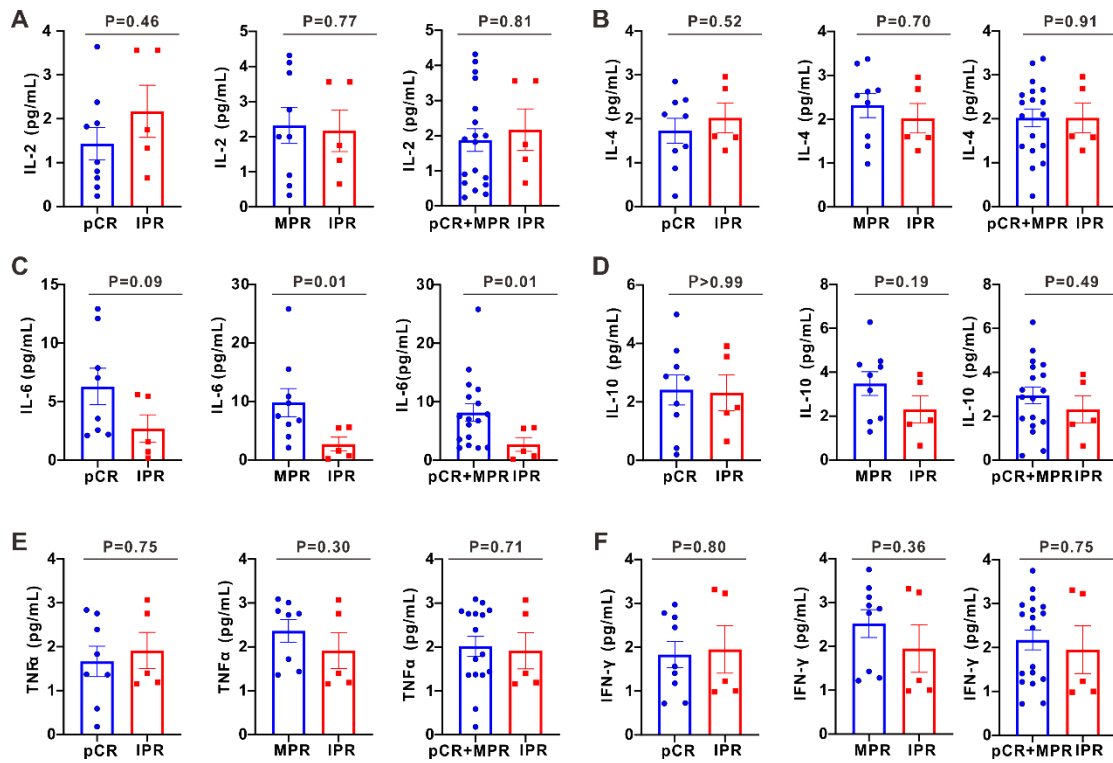

Supplement: ccr-22-0666_supplementary_fig.s4_suppfs4.pdf [file ccr-22-0666_supplementary_fig.s4_suppfs4.pdf]
